# Supplementary material for: Association between biomarkers of tissue inflammation and progression of osteoarthritis: evidence from the Rotterdam study cohort
Source: Springer Nature journal article supplement (doi:10.1186/s13075-016-0976-3), 2016-04-01
Supplement: MOESM1 [file 10028152]

**Supplementary Table 1.** Adjusted odds ratios (OR) and 95% confidence intervals (CI) from logistic regression models for incident and progression of knee and hip OA in relation to biomarkers levels

|                   | Knee OA               |         |                           |         | Hip OA                |         |                          |         |
|-------------------|-----------------------|---------|---------------------------|---------|-----------------------|---------|--------------------------|---------|
|                   | Incidence, n=68/1029† |         | Progression*, n=122/1157‡ |         | Incidence, n=32/1191† |         | Progression*, n=53/1233‡ |         |
|                   | OR (95% CI)           | p-value | OR (95% CI)               | p-value | OR (95% CI)           | p-value | OR (95% CI)              | p-value |
| <b>uCTX-II</b>    | 1.2 (0.9-1.6)         | 0.13    | 1.2 (1.01-1.5)            | 0.04    | 1.4 (1-2.1)           | 0.05    | 1.4 (1.1-1.9)            | 0.02    |
| <b>COMP</b>       | 1.6 (1.2-2.04)        | 0.0004  | 1.4 (1.2-1.7)             | 0.001   | 0.8 (0.6-1.1)         | 0.23    | 0.91 (0.7-1.2)           | 0.54    |
| <b>CRPM</b>       | 1.2 (0.9-1.5)         | 0.21    | 1.2 (1.01-1.5)            | 0.05    | 1.3 (0.9-1.8)         | 0.17    | 1.2 (0.91-1.7)           | 0.19    |
| <b>C1M</b>        | 1.1 (0.9-1.4)         | 0.47    | 1.1 (0.93-1.4)            | 0.23    | 1.2 (0.9-1.6)         | 0.32    | 1.1 (0.87-1.5)           | 0.35    |
| <b>CRP</b>        | 1.4 (1.1-1.8)         | 0.01    | 1.2 (1.01-1.5)            | 0.04    | 1.5 (1.1-2.2)         | 0.02    | 1.3 (0.94-1.7)           | 0.12    |
| <b>Full model</b> |                       |         |                           |         |                       |         |                          |         |
| uCTX-II           | 1.2 (0.9-1.6)         | 0.19    | 1.2 (0.97-1.5)            | 0.09    | 1.5 (1.1-2.2)         | 0.02    | 1.5 (1.1-2.04)           | 0.009   |
| COMP              | 1.6 (1.2-2.04)        | 0.001   | 1.4 (1.14-1.7)            | 0.002   | 0.8 (0.6-1.1)         | 0.18    | 0.9 (0.66-1.2)           | 0.40    |
| CRPM              | 1.1 (0.9-1.5)         | 0.37    | 1.2 (0.95-1.5)            | 0.13    | 1.2 (0.8-1.8)         | 0.28    | 1.2 (0.85-1.6)           | 0.32    |
| C1M               | 0.8 (0.6-1.1)         | 0.25    | 0.96 (0.8-1.2)            | 0.77    | 0.8 (0.5-1.2)         | 0.25    | 0.94 (0.7-1.3)           | 0.74    |
| CRP               | 1.7 (1.2-2.3)         | 0.004   | 1.3 (0.98-1.7)            | 0.07    | 1.7 (1.1-2.8)         | 0.03    | 1.3 (0.89-1.9)           | 0.18    |

All models were adjusted for age, sex, body mass index, and follow-up time; Full models include all biomarkers adjusted for age, sex, body mass index, and follow-up time; †case number/ control number; ‡progressed/no-progressed; \*additionally adjusted for prevalent OA; OA incidence defined as KL $\geq$ 2 at left and/or right joint; subjects were free of hip and knee OA at baseline for hip and knee incidence analyses, respectively.
