# Supplementary material for: Association between biomarkers of tissue inflammation and progression of osteoarthritis: evidence from the Rotterdam study cohort
Source: Springer Nature journal article supplement (doi:10.1186/s13075-016-0976-3), 2016-04-01
Supplement: MOESM2 [file 10028152]

**Supplementary Table 2.** Discrimination, described as AUC (95% Confidence Interval), for the risk prediction models of osteoarthritis (OA)

|                                                              | <b>Incident OA</b>  | <b>Progression of OA</b> |
|--------------------------------------------------------------|---------------------|--------------------------|
| Age, sex, BMI                                                | 0.677 (0.620-0.735) | 0.681 (0.639-0.722)      |
| Age, sex, BMI, joint pain                                    | 0.682 (0.624-0.740) | 0.688 (0.646-0.731)      |
| Age, sex, BMI, joint pain, all biomarkers                    | 0.746 (0.695-0.796) | 0.731 (0.691-0.771)      |
| Age, sex, BMI, joint pain, baseline KL score                 | 0.845 (0.809-0.881) | 0.893 (0.874-0.913)      |
| Age, sex, BMI, joint pain, baseline KL score, all biomarkers | 0.872 (0.839-0.905) | 0.899 (0.880-0.918)      |

body mass index (BMI); Kellgren-Lawrence (KL); (urinary) type II collagen degradation (uCTX-II); cartilage oligomeric protein (COMP)
